# Supplementary material
Source: publisher figshare collection journal article supplement (https://karger.figshare.com/ndownloader/files/35056999)

**Fig. S2. Sub-group analysis of relapse free survival for the patients with solid tumour**

Kaplan-Meier plots of relapse free survival in the patients with solid tumour are shown for the presence or absence of *E148Q/L110P* or *P369S/R408Q*. The Kaplan-Meier curves of patients with minor variants are shown in black, while those of patients without these variants are shown in grey. The overall survival rates and the numbers of patients were recorded near each survival curve. The + on the curve represents censoring, and the p-values (log-rank test) are shown at the bottom right of each Kaplan-Meier curve.

**Fig. S2**


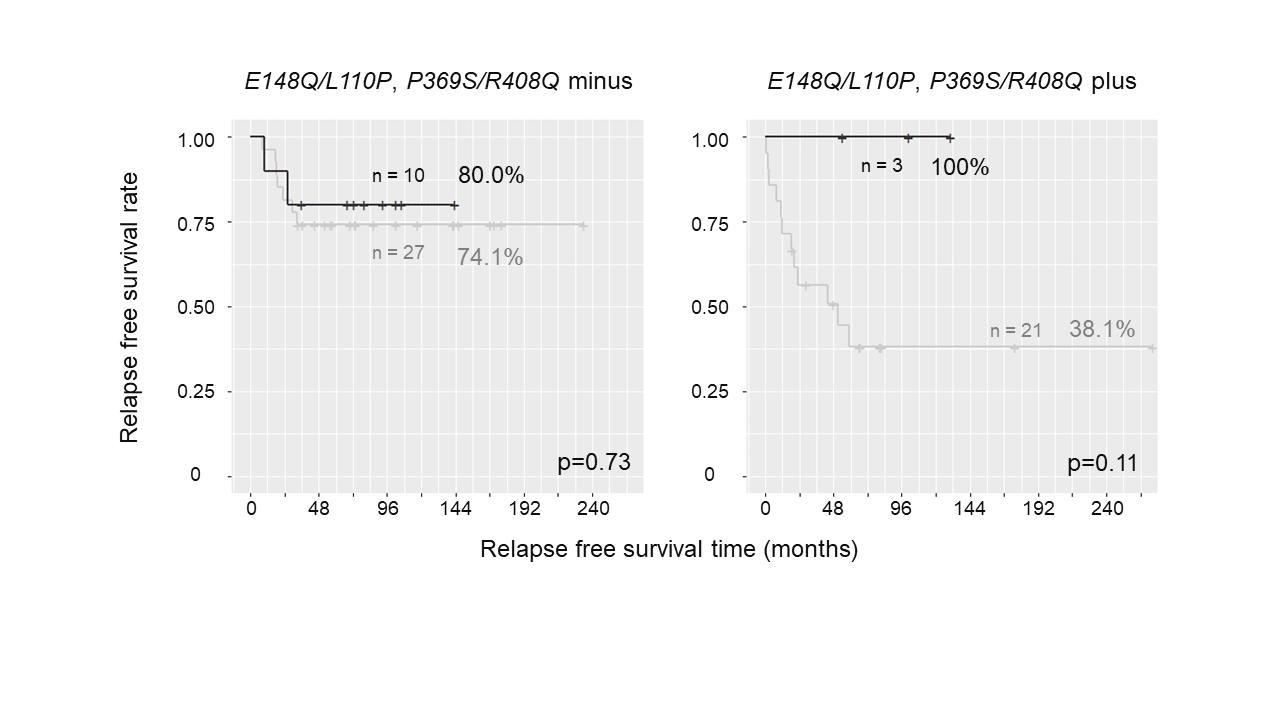

Supplement: Supplementary file 1 [file 35056999]
